# Supplementary material
Source: publisher site journal article supplement (https://www.dovepress.com/get_supplementary_file.php?f=228073.docx)
Supplement: Supplementary file 1 [file get_supplementary_file.php]

**[Supplementary](javascript:;)**[**materials**](javascript:;)

| **Table S1. Reliability Statistics** | |
| --- | --- |
| Cronbach's Alpha | N of Items |
| 0.706 | 7 |

Note: The Cronbach's Alpha value greater than 0.7 indicates that the reliability of the questionnaire is good.

| **Table S2.KMO and Bartlett's Test** | | |
| --- | --- | --- |
| Kaiser-Meyer-Olkin Measure of Sampling Adequacy. |  | 0.778 |
| Bartlett's Test of Sphericity | Approx. Chi-Square | 3123.169 |
|  | df | 21 |
|  | Sig. | <0.001 |

Note: The KMO value greater than 0.7 means it is suitable for factor analysis. The value of Bartlett's sphericity test means potential factors could be extracted.

| **Table S3.Communalities** | | |
| --- | --- | --- |
|  | Initial | Extraction |
| Degree of hospital convenience | 1 | 0.876 |
| Hospital facilities and environment | 1 | 0.658 |
| Medical Staff Services Technology | 1 | 0.69 |
| Medical staff service attitude | 1 | 0.593 |
| Medical expense | 1 | 0.614 |
| Reimbursement ratio for medical expenses | 1 | 0.616 |
| Drug expense | 1 | 0.5 |
| Note: Extraction method is Maximum Likelihood Analysis. | | |

| **Table S4.Total Variance Explained** | | | | | | | | | |
| --- | --- | --- | --- | --- | --- | --- | --- | --- | --- |
| Component | Initial Eigenvalues | | | Extraction Sums of Squared Loadings | | | Rotation Sums of Squared Loadings | | |
| Total | % of Variance | Cumulative % | Total | % of Variance | Cumulative % | Total | % of Variance | Cumulative % |
| 1 | 2.649 | 37.843 | 37.843 | 2.649 | 37.843 | 37.843 | 1.753 | 25.038 | 25.038 |
| 2 | 1.179 | 16.845 | 54.688 | 1.179 | 16.845 | 54.688 | 1.677 | 23.958 | 48.996 |
| 3 | 0.718 | 10.255 | 64.943 | 0.718 | 10.255 | 64.943 | 1.116 | 15.947 | 64.943 |
| 4 | 0.716 | 10.223 | 75.167 |  |  |  |  |  |  |
| 5 | 0.680 | 9.719 | 84.886 |  |  |  |  |  |  |
| 6 | 0.569 | 8.135 | 93.021 |  |  |  |  |  |  |
| 7 | 0.489 | 6.979 | 100.000 |  |  |  |  |  |  |
| Note: Extraction method is Maximum Likelihood Analysis. | | | | | | | | | |

**Questionnaire on patients' satisfaction with comprehensive reform of public hospitals in Wuhan**

**( Items related to this paper)**

Full name of hospital: Date of filling:

Hello! The purpose of this study is to understand the satisfaction of patients with the reform of public hospitals. The study was reviewed and approved by the Ethics Committee of Puai hospital, Wuhan, China (No: KY 2018-027-01). The information you provide us is only used for the summary analysis and policy formulation. According to relevant provisions of the statistical law of the People's Republic of China, we will keep confidential the whole content of your answers. Any information you provide will not be disclosed to any private institutions or others in any form. Therefore, I hope to get your strong support, please truthfully fill in. If you do not agree to participate in the survey, please return the blank questionnaire directly. Thank you very much for your cooperation!

| Basic information | answer |
| --- | --- |
| 1.Gender :(1) male (2) female |  |
| 2.Age :(years) |  |
| 3.Place of residence :(1) within Wuhan city (2) Hubei province outside of Wuhan (3) outside Hubei province |  |
| 4.Type of medical insurance:(1) Medical insurance systems for urban workers (2) Medical insurance for urban residents (3)New rural cooperative medical insurance (4) Free medical care (5) commercial medical insurance (6) other medical insurance (7) Uninsured |  |
|  |  |
| 1.Hospital affiliation: (1) Hospital administered by the National Health Commission (2) Provincial Hospital(3) Municipal hospital(4) District hospital(5) Military hospital (6) Enterprise-owned hospital | According to the full name of the hospital, the research team asked the administrative department for the results. |
| 2.Hospital level: (1) Secondary hospital (2)Tertiary hospital | As above |
| 3.Hospital category: (1) General Hospital (2) Specialized Hospital (3) Hospital of Chinese Medicine (4) Maternal and Child Health Hospital | As above |
|  |  |
| 1.Treatment type :(1) outpatient (2) inpatient |  |
| 3.Reason for medical :(1) Be sick (2) Prescribe drugs regularly (3) Prescribe for others (4) Prevention and healthcare |  |
| 3.Whether this hospital is the preferred medical institution :(1) yes (2) no |  |
| 4.Registration method :(1) Register in the hospital (2) Register online (3) Register by phone (4) Register by community (5) Other methods |  |
|  |  |
| Satisfaction with the medical experience |  |
| 1.Overall, are you satisfied with this visit?(1) dissatisfaction (2) Moderate (3) satisfaction |  |
| 2.How convenient it is for you and your family to visit our hospital :(1) in convenient (2) Moderate (3) convenient |  |
| 3.Hospital facilities and environment :(1) bad (2) Moderate (3) good |  |
| 4. Medical Staff Services Technology :(1) bad (2) Moderate (3) good |  |
| 5.Medical staff service attitude :(1) bad (2) Moderate (3) good |  |
| 6.The medical expenses for the treatment :(1) expensive (2) Moderate (3) not expensive |  |
| 7.Are you satisfied with the proportion of medical expenses reimbursed in the hospital?  (1) dissatisfaction (2) Moderate (3) satisfaction |  |
| 8.The drug cost of the medical treatment: (1) expensive (2) Moderate (3) not expensive |  |

**武汉市公立医院综合改革患者满意度问卷调查**

(与本文相关的条目)

医院全称: 填写日期:

你好!本研究的目的是了解患者对公立医院改革的满意度。该研究得到了中国武汉普爱医院伦理委员会的审查和批准(编号:KY 2018-027-01)。您提供给我们的信息仅用于总结分析和政策制定。根据《中华人民共和国统计法》的有关规定，我们将对您回答的全部内容保密。您提供的任何信息都不会以任何形式透露给任何私人机构或其他人。因此，我希望得到您的大力支持，请如实填写。如果您不同意参加调查，请直接返回空白问卷。非常感谢您的合作！

| 基本情况 | 回答 |
| --- | --- |
| 1.性别:(1) 男 (2) 女 |  |
| 2.年龄 :(岁) |  |
| 3.居住地 :(1) 武汉市内 (2)湖北省内武汉市外(3)湖北省外 |  |
| 4.您参加医疗保险的形式:(1) 城镇职工医疗保险(2) 城镇居民医疗保险 (3)新型农村合作医疗 (4) 公费医疗(5) 商业医疗保险 (6) 其他医疗保险 (7) 未参加医疗保险 |  |
|  |  |
| 1.医院隶属关系 (1) 国家委属医院(2) 省级医院(3)市级医院(4) 区级医院(5) 军队医院 (6) 企业医院 | 由研究组根据医院全称询问行政部门得到结果 |
| 2.医院级别: (1) 二级医院 (2)三级医院 | 同上 |
| 3.医院类别: (1) 综合医院 (2) 专科医院 (3)中医医院 (4)妇幼保健医院 | 同上 |
|  |  |
| 1.就诊类别:(1) 门诊 (2) 住院 |  |
| 2.就诊原因:(1) 患病 (2) 定期到医院开药 (3) 为他人开药(4) 预防保健 |  |
| 3.此医院是否是您此次患病的首诊医院 :(1)是 (2) 否 |  |
| 4.挂号形式 :(1) 在医院挂号 (2) 网上挂号 (3) 电话挂号(4) 通过社区挂号 (5) 其他形式 |  |
|  |  |
| 就医体验满意度 |  |
| 1.总体来看，您对本次就医满意么?(1) 不满意 (2) 一般 (3) 满意 |  |
| 2.您和家人到本医院看病的方便程度 :(1) 不方便 (2) 一般(3) 方便 |  |
| 3.医院的设施和环境:(1) 不好(2)一般 (3)很好 |  |
| 4. 医务人员的技术水平 :(1) 不好 (2)一般 (3)很好 |  |
| 5.医务人员服务态度 : (1) 不好 (2)一般 (3)很好 |  |
| 6.本次就医的诊疗的费用:(1)贵 (2)一般 (3) 不贵 |  |
| 7.您对医药费用的报销比例满意么?  (1) 不满意 (2) 一般 (3) 满意 |  |
| 8.本次就医的药品费用: (1)贵 (2)一般 (3) 不贵 |  |
